# Supplementary figures and images for: Evaluation of the Fermentation Profiles and Quality Attributes of Yogurts Made from Cow, Goat, and Mixed Milk
Source: MDPI journal article supplement (doi:10.3390/foods15020314), 2026-01-15

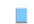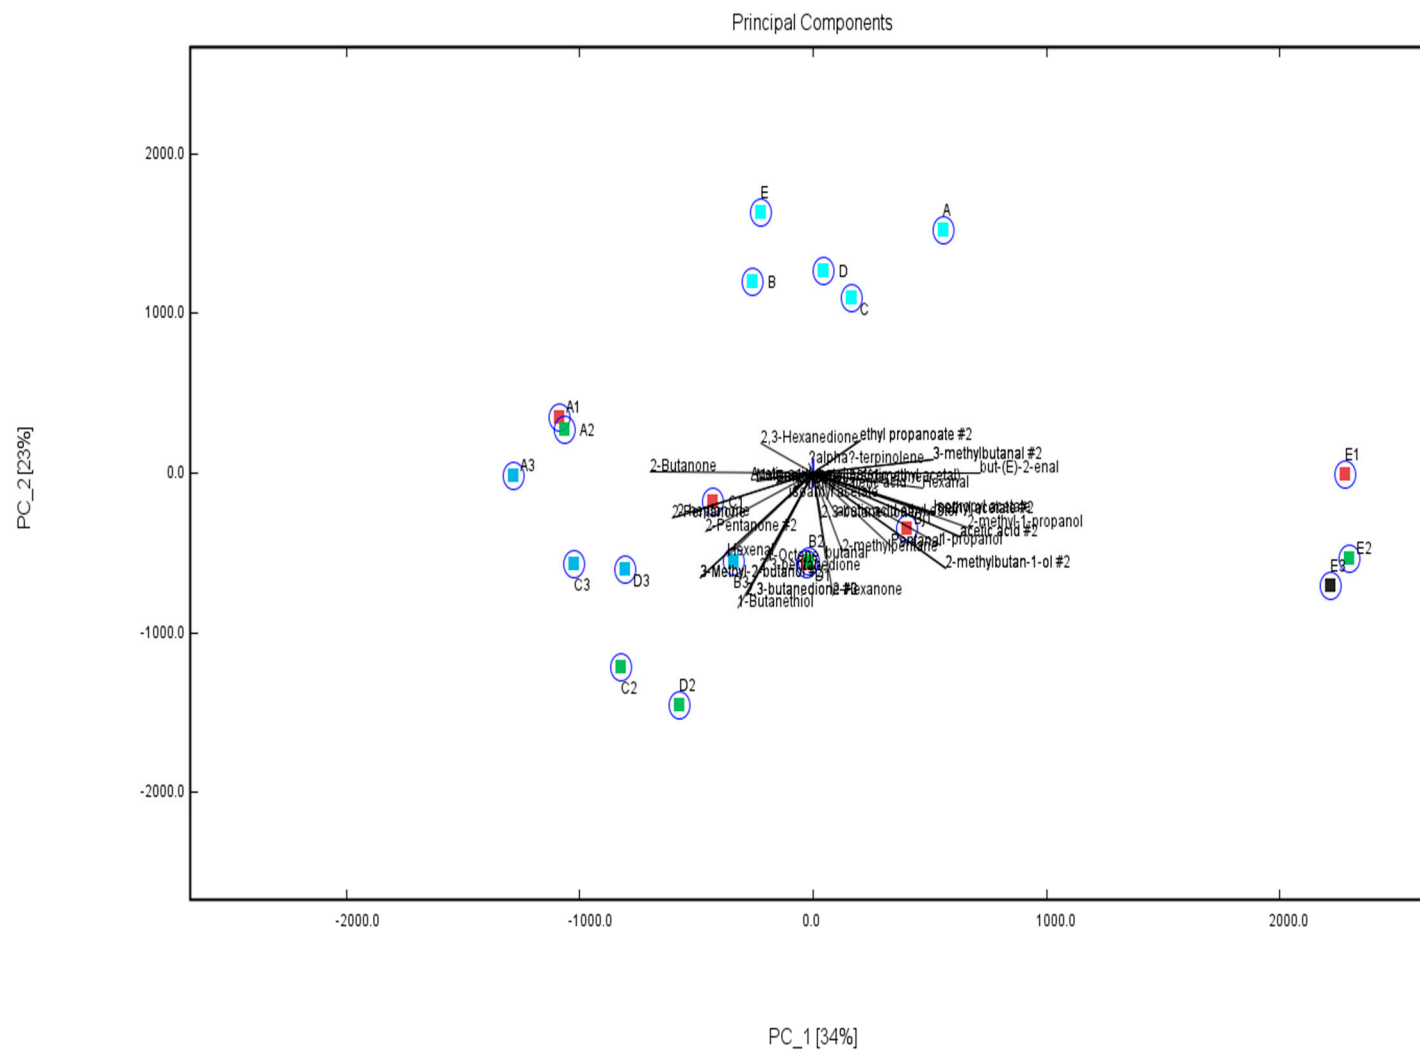

**Figure S1.** Principal component analysis (PCA) biplot of volatile components in milk and yogurts

Supplement: s1 [file foods-4079267-supplementary.pdf › foods-4079267-supplementary.pdf]
